# Supplementary material for: Photothermal-assisted surface-mediated gene delivery for enhancing transfection efficiency
Source: Royal Society of Chemistry journal article supplement (doi:10.1039/c9bm01284b), 2019-01-01
Supplement: c9bm01284b1.pdf [file c9bm01284b1.pdf]

# Photothermal-assisted surface-mediated gene delivery for enhancing transfection efficiency

*He Zhang<sup>‡,a</sup>, Jing Wang<sup>‡,a</sup>, Mi Hu,<sup>a</sup> Bo-chao Li,<sup>a</sup> Huan Li,<sup>a</sup> Ting-ting Chen,<sup>a</sup> Ke-Feng Ren,<sup>\*a</sup> Jian Ji,<sup>a</sup> Quan-ming Jin<sup>\*b</sup> and Guo-sheng Fu<sup>\*a</sup>*

- a. Department of Cardiology, Sir Run Run Shaw Hospital, MOE Key Laboratory of Macromolecule Synthesis and Functionalization, Department of Polymer Science and Engineering, Zhejiang University, Hangzhou 310027, China.
- b. General Hospital of Northern Theater Command, Shenyang 110004, China.

\* Corresponding author: renkf@zju.edu.cn, fugs@zju.edu.cn, jqm8806@126.com

<sup>‡</sup> Equal contributing authors.

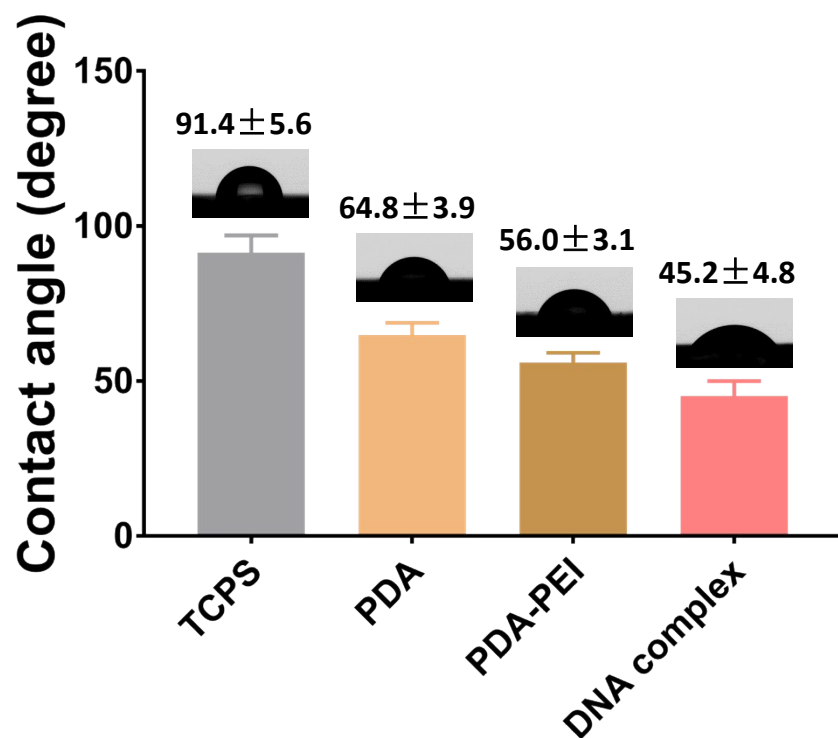

**Figure S1.** Water contact angles and digital photographs of water drops on TCPS, PDA, PDA-PEI, and pDNA-immobilized PDA-PEI surfaces. Experiments were repeated five times independently.

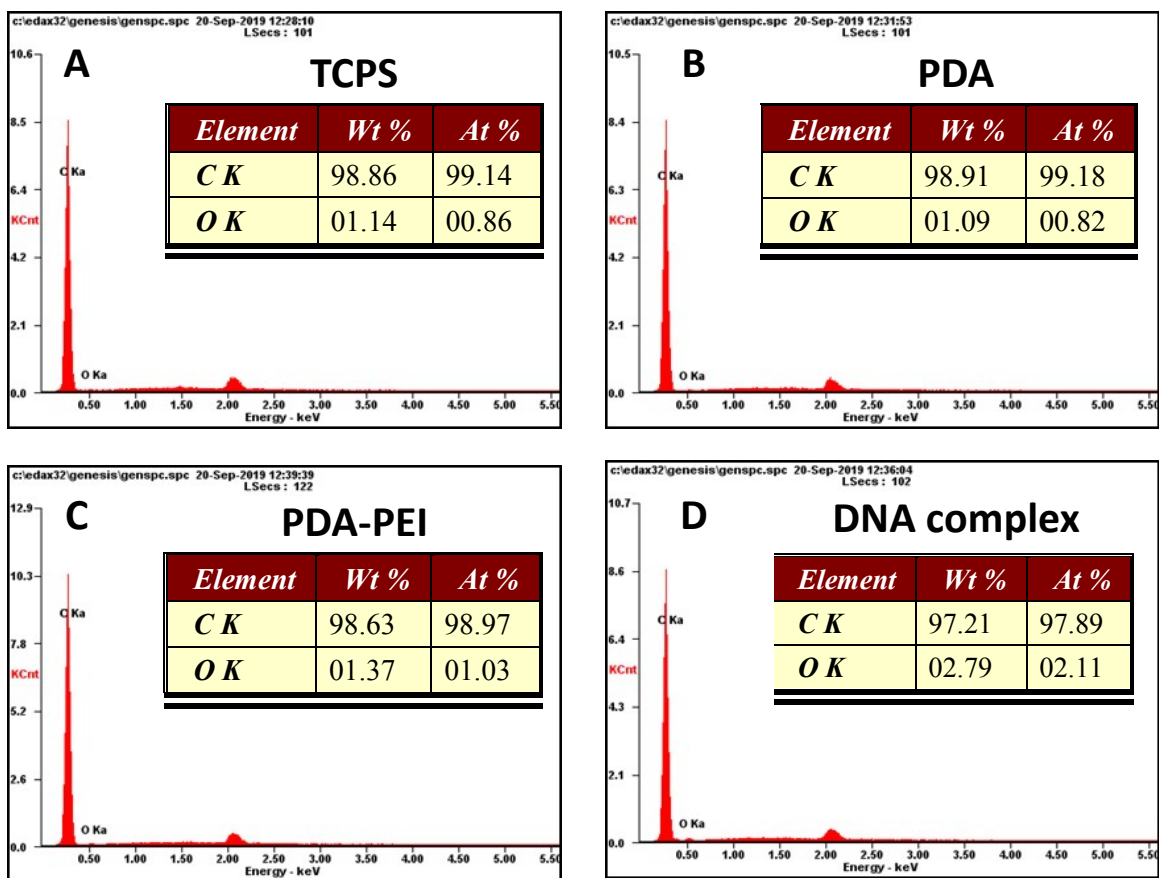

**Figure S2.** The elemental compositions of TCPS (A), PDA (B), PDA-PEI (C), and pDNA-immobilized PDA-PEI (D) surfaces examined by EDX.

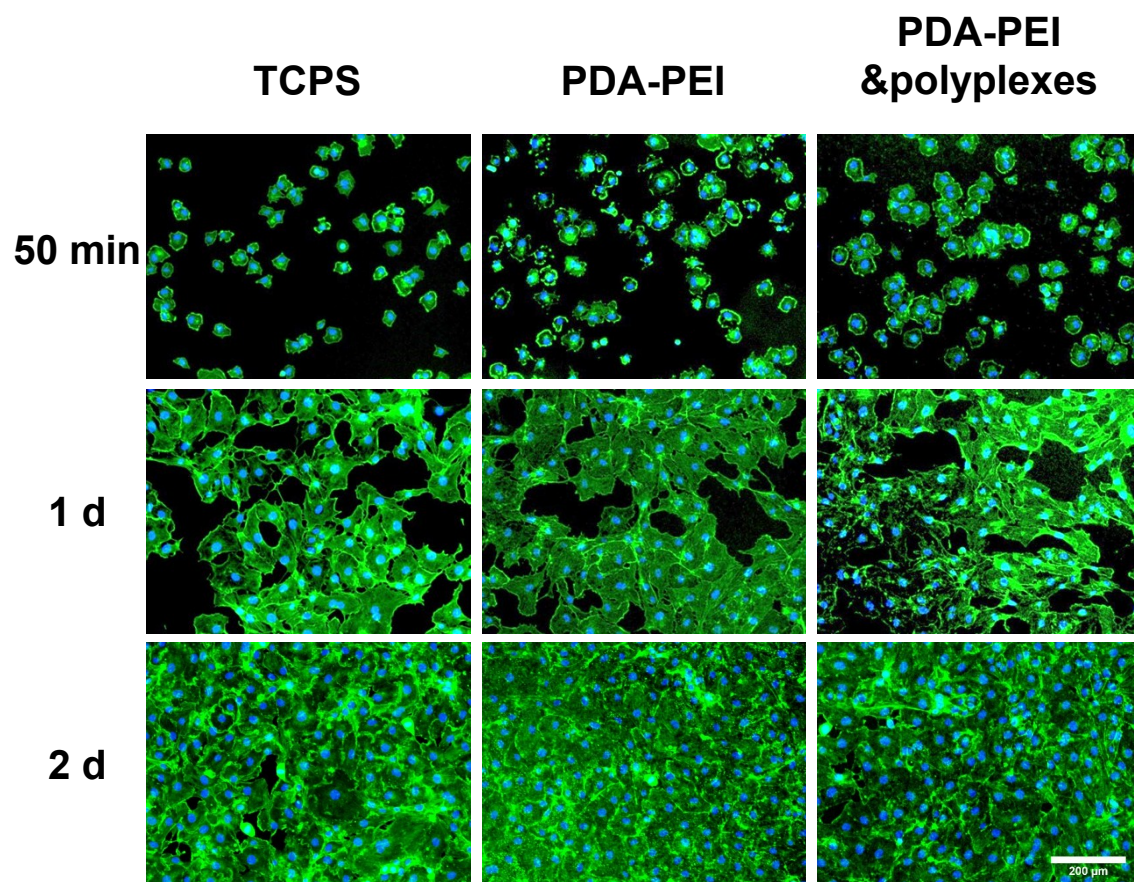

**Figure S3.** Fluorescence images of ECs stained by F-actin (green) and nuclei (blue) on TCPS, PDA, PDA-PEI, and PDA-PEI-polyplexes. The scale bar is 200  $\mu\text{m}$ .

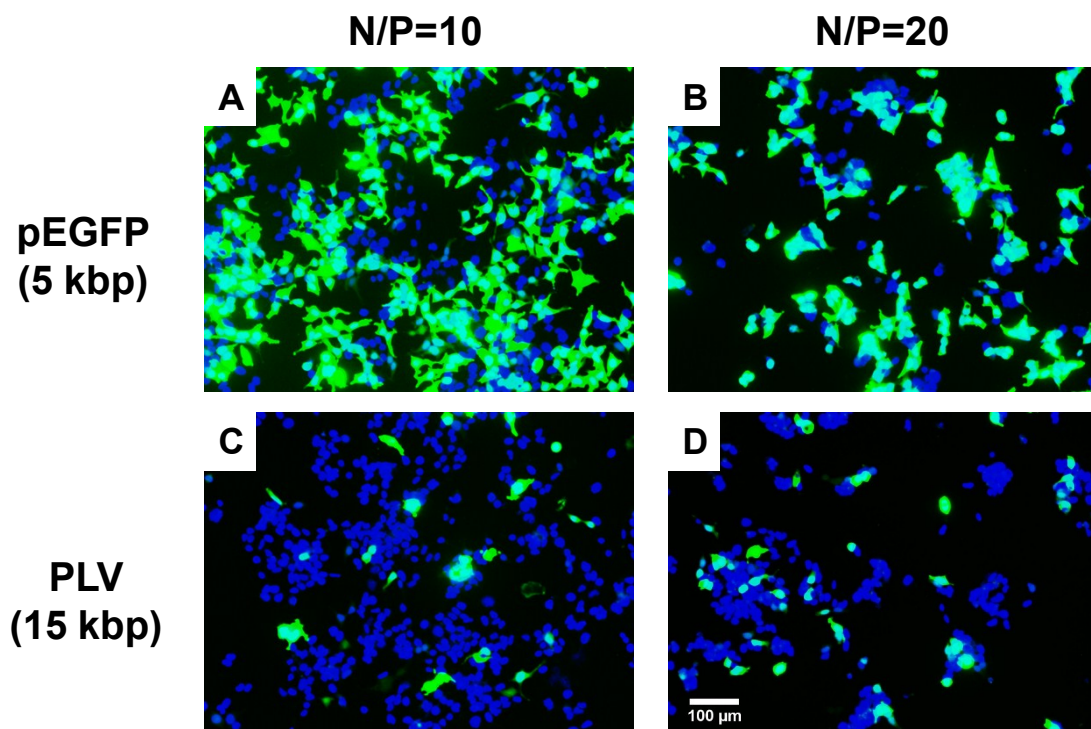

**Figure S4.** Transfection of pEGFP (A-B) and a large size pDNA (PLV-CAG-EGFP, C-D) to 293T cells by traditional bolus transfection with N/P values of 10 (A, C) and 20 (B, D). Cell nuclei were counterstained by DAPI (blue). The scale bar is 100  $\mu$ m.

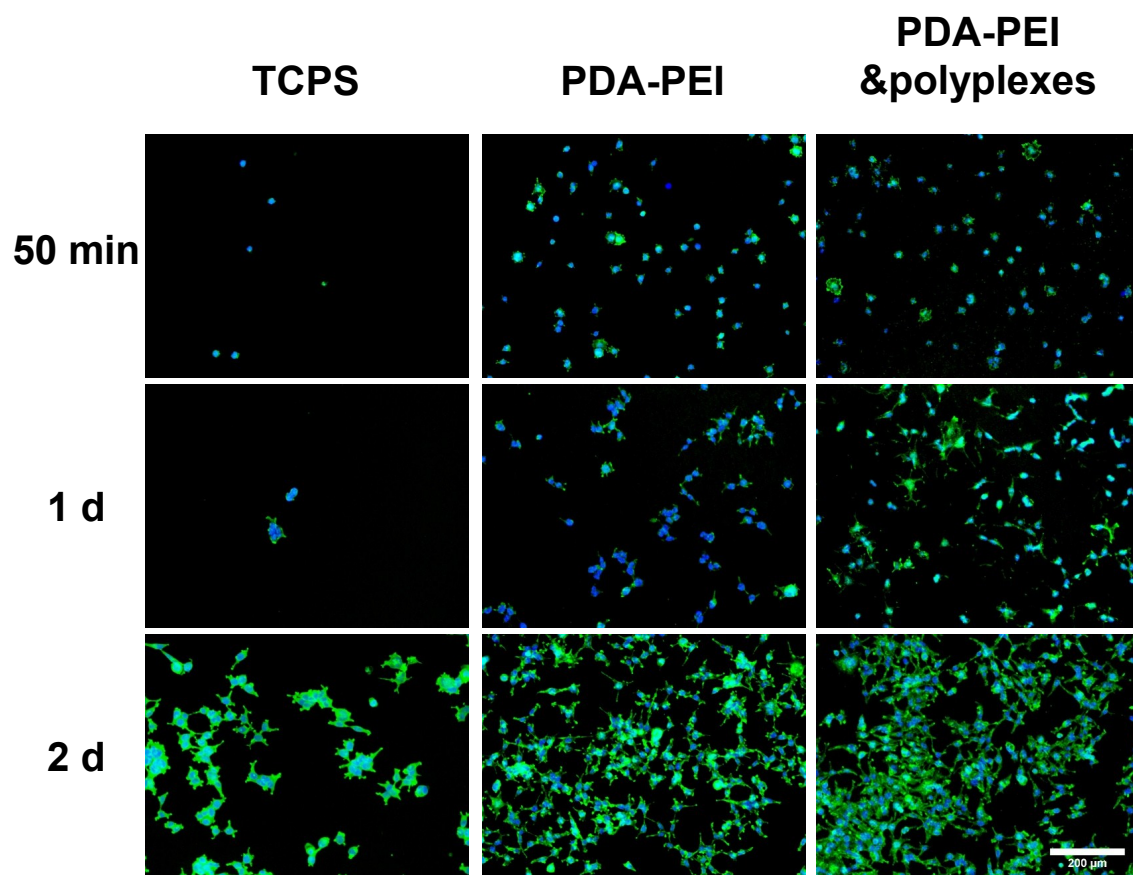

**Figure S5.** Fluorescence images of 293T stained by F-actin (green) and nuclei (blue) on TCPS, PDA, PDA-PEI, and PDA-PEI-polyplexes. The scale bar is 200  $\mu\text{m}$ .

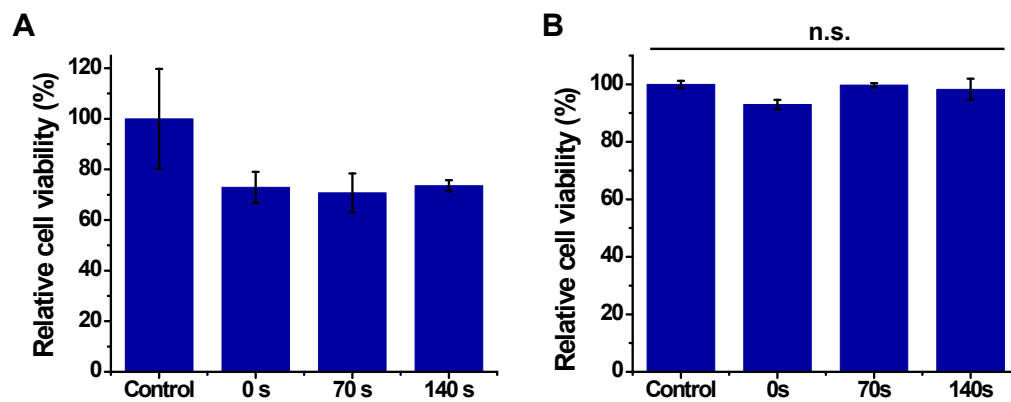

**Figure S6.** Viability of ECs (A) and 293T cells (B) following various irradiation time (0 s, 70 s, and 140s). Experiments were repeated five times independently.
